# Supplementary material
Source: PubMed Central journal article supplement (PMC5839164)
Supplement: NIHMS944786-supplement-supplement_1.pdf [file NIHMS944786-supplement-supplement_1.pdf]

## Supplemental Online Information

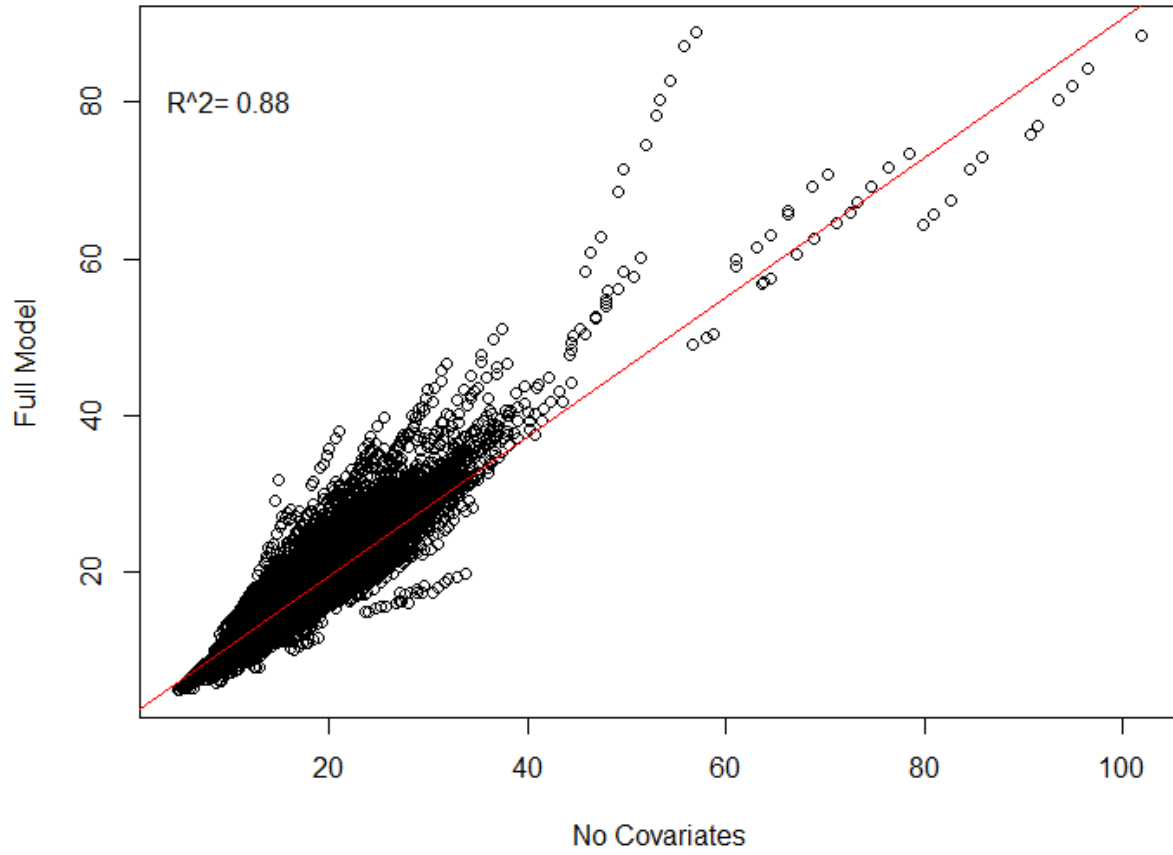

Figure S1. Scatterplot of posterior estimates of suicide rates, model with no covariates vs. model with all covariates.

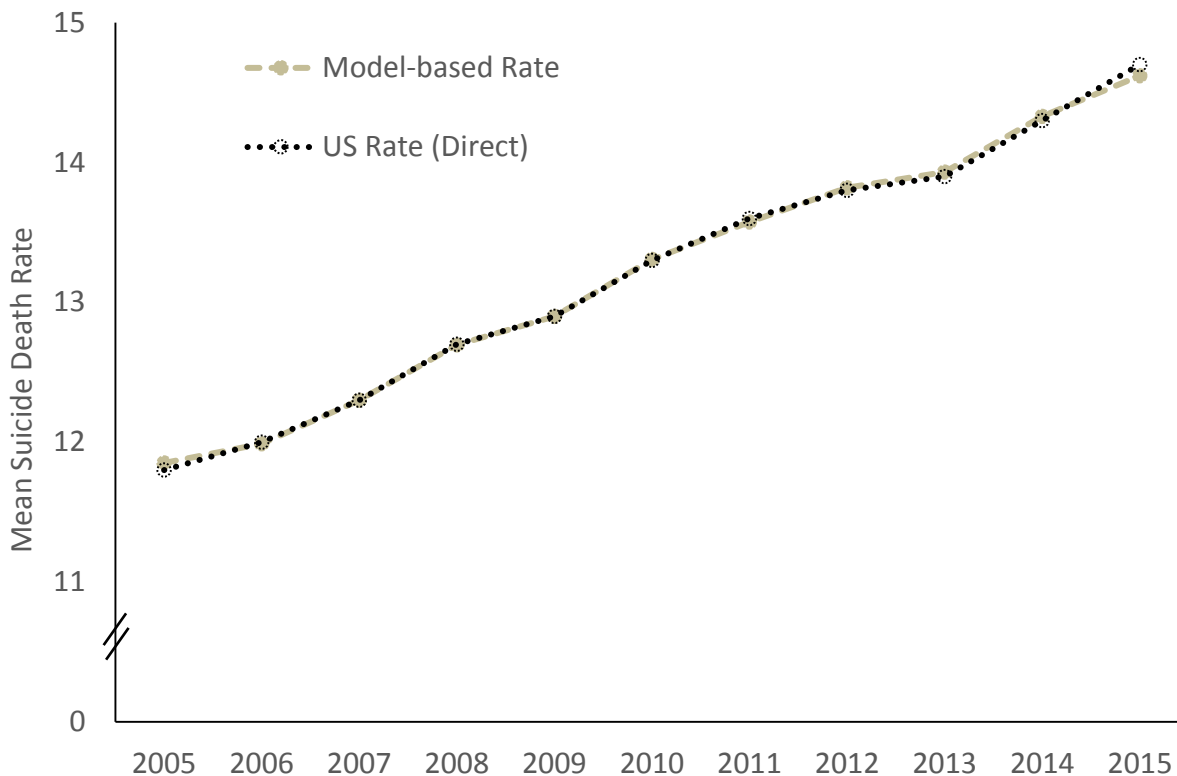

Figure S2. Suicide death rates in the U.S., 2005-2015. Mean county-level model-based estimates and direct estimates, weighted by county population size.

**Table s1. Covariates and data sources.**

|                                              |                     |                                                                             |
|----------------------------------------------|---------------------|-----------------------------------------------------------------------------|
| Land area (sq mi)                            | Area Resource Files | Decennial Census, 2000, 2010 <sup>1</sup>                                   |
| Mean household size                          | Area Resource Files | Decennial Census, 2000, 2010                                                |
| Housing Unit Density per Square Mile         | Area Resource Files | Decennial Census, 2000, 2010                                                |
| Median age                                   | Area Resource Files | Decennial Census, 2000, 2010                                                |
| Median household income                      | Area Resource Files | American Community Survey (ACS), 2006-2010, 2009-2013                       |
| Median home value                            | Area Resource Files | ACS, 2006-2010, 2009-2013                                                   |
| Median gross rent                            | Area Resource Files | ACS, 2006-2010, 2009-2013                                                   |
| % Housing Units with more than 1 person/room | Area Resource Files | ACS, 2006-2010, 2009-2013                                                   |
| Percent American Indian or Alaska Native     | Area Resource Files | Decennial Census, 2000, 2010                                                |
| Median per capita income                     | Area Resource Files | Regional Economic Information (REIS), 2005,2010,2011,2012,2013 <sup>2</sup> |

<sup>1</sup> Estimates between 2000 and 2010 were linearly interpolated for each year.

<sup>2</sup> Values from 2013 were carried forward for 2014 and 2015.

|                                                                    |                                                    |                                                                                    |
|--------------------------------------------------------------------|----------------------------------------------------|------------------------------------------------------------------------------------|
| Percent Asian                                                      | Area Resource Files                                | Decennial Census, 2000, 2010                                                       |
| Percent non-Hispanic Black                                         | Area Resource Files                                | Decennial Census, 2000, 2010                                                       |
| % Persons aged 25+ w/ 4+ Yrs College                               | Area Resource Files                                | ACS, 2006-2010, 2009-2013                                                          |
| Percent of females divorced                                        | Area Resource Files                                | ACS, 2006-2010, 2009-2013                                                          |
| Percent female headed household                                    | Area Resource Files                                | Decennial Census, 2000, 2010                                                       |
| Percent foreign born                                               | Area Resource Files                                | ACS, 2006-2010, 2009-2013                                                          |
| Percent Hispanic                                                   | Area Resource Files                                | Decennial Census, 2000, 2010                                                       |
| % Persons aged 25+ w/ High School Diploma                          | Area Resource Files                                | ACS, 2006-2010, 2009-2013                                                          |
| % Persons aged 25+ w/ less than High School Diploma                | Area Resource Files                                | ACS, 2006-2010, 2009-2013                                                          |
| Percent in owner-occupied housing                                  | Area Resource Files                                | Decennial Census, 2000, 2010                                                       |
| Percent below the poverty level                                    | Area Resource Files                                | Census SAIPE, 2005,2006,2007,2008,2009,2010, 2011,2012,2013 <sup>3</sup>           |
| Percent rural population                                           | Area Resource Files                                | Decennial Census, 2000, 2010                                                       |
| Percent urban population                                           | Area Resource Files                                | Decennial Census, 2000, 2010                                                       |
| Percent non-Hispanic White                                         | Area Resource Files                                | Decennial Census, 2000, 2010                                                       |
| Percent workers in agriculture/forestry/fishing/hunting/ mine work | Area Resource Files                                | ACS, 2006-2010, 2009-2013                                                          |
| Percent workers in construction                                    | Area Resource Files                                | ACS, 2006-2010, 2009-2013                                                          |
| Percent workers in Education/Healthcare/Social Assistance          | Area Resource Files                                | ACS, 2006-2010, 2009-2013                                                          |
| Percent workers in manufacturing                                   | Area Resource Files                                | ACS, 2006-2010, 2009-2013                                                          |
| Percent workers in Other Industries                                | Area Resource Files                                | ACS, 2006-2010, 2009-2013                                                          |
| Unemployment rate, 16+                                             | Area Resource Files                                | Bureau of Labor Stats (BLS), 2005,2010,2011,2012,2013,2014 <sup>4</sup>            |
| Veteran population estimate                                        | Area Resource Files                                | Dept of Veteran's Affairs, 2005,2006,2007,2008,2009,2010, 2011,2012,2013,2014,2015 |
| Number of violent crimes                                           | Uniform Crime Reporting Program Data: County-Level | 2005,2006,2007,2008,2009,2010,2011,2012,2013,2014 <sup>5</sup>                     |

<sup>3</sup> Values from 2013 were carried forward for 2014 and 2015.

<sup>4</sup> Values from 2014 were carried forward to 2015.

<sup>5</sup> Values from 2014 were carried forward to 2015.

|                                                                                                                      | Detailed Arrest and Offense Data                                                    |                                                   |
|----------------------------------------------------------------------------------------------------------------------|-------------------------------------------------------------------------------------|---------------------------------------------------|
| Number of property crimes                                                                                            | Uniform Crime Reporting Program Data: County-Level Detailed Arrest and Offense Data | 2005,2006,2007,2008,2009,2010,2011,2012,2013,2014 |
| Number of drug abuse violations-total                                                                                | Uniform Crime Reporting Program Data: County-Level Detailed Arrest and Offense Data | 2005,2006,2007,2008,2009,2010,2011,2012,2013,2014 |
| All other offenses except traffic                                                                                    | Uniform Crime Reporting Program Data: County-Level Detailed Arrest and Offense Data | 2005,2006,2007,2008,2009,2010,2011,2012,2013,2014 |
| Estimated number of foreclosure starts divided by number of mortgages times 100.                                     | Housing and Urban Development Small Area Foreclosure Rates <sup>6</sup>             | 2007-2008 <sup>7</sup>                            |
| United States Postal Service data from June 2008 on residential addresses vacant 90-days or longer                   | Housing and Urban Development Small Area Foreclosure Rates                          | 2008 <sup>7</sup>                                 |
| Estimated high cost loan rate: percent of loans shown to be high cost according to Home Mortgage Disclosure Act data | Housing and Urban Development Small Area Foreclosure Rates                          | 2004-2006 <sup>8</sup>                            |
| Illicit drug or alcohol abuse/dependence in past year                                                                | National Survey of Drug Use and Health Substate Estimates                           | 2006-2008,2008-2010,2010-2012 <sup>9</sup>        |
| Any mental illness in past year                                                                                      | National Survey of Drug Use and Health Substate Estimates                           | 2006-2008,2008-2010,2010-2012                     |

<sup>6</sup> [https://www.huduser.gov/portal/datasets/nsp\\_foreclosure\\_data.html](https://www.huduser.gov/portal/datasets/nsp_foreclosure_data.html)

<sup>7</sup>Time-invariant variable.

<sup>8</sup> Time-invariant variable.

<sup>9</sup> Values from the 2010-2012 data were carried forward to 2015.

|                                                                                                                                           |                                                           |                                                                 |
|-------------------------------------------------------------------------------------------------------------------------------------------|-----------------------------------------------------------|-----------------------------------------------------------------|
| Nonmedical Use of Pain Relievers in the Past Year among Individuals Aged 12 or Older                                                      | National Survey of Drug Use and Health Substate Estimates | 2006-2008,2008-2010,2010-2012                                   |
| Major Depressive Episode in the Past Year among Adults Aged 18 or Older                                                                   | National Survey of Drug Use and Health Substate Estimates | 2006-2008,2008-2010,2010-2012                                   |
| Marijuana Use in the Past Year among Individuals Aged 12 or Older                                                                         | National Survey of Drug Use and Health Substate Estimates | 2006-2008,2008-2010,2010-2012                                   |
| Serious Mental Illness in the Past Year among Adults Aged 18 or Older                                                                     | National Survey of Drug Use and Health Substate Estimates | 2006-2008,2008-2010,2010-2012                                   |
| Had Serious Thoughts of Suicide in the Past Year among Adults Aged 18 or Older                                                            | National Survey of Drug Use and Health Substate Estimates | 2006-2008,2008-2010,2010-2012                                   |
| Illicit Drug Use in the Past Month among Individuals Aged 12 or Older                                                                     | National Survey of Drug Use and Health Substate Estimates | 2006-2008,2008-2010,2010-2012                                   |
| Tobacco Product Use in the Past Month among Individuals Aged 12 or Older                                                                  | National Survey of Drug Use and Health Substate Estimates | 2006-2008,2008-2010,2010-2012                                   |
| Treatment gap for alcohol - Needing But Not Receiving Treatment for Alcohol Use in the Past Year among Individuals Aged 12 or Older       | National Survey of Drug Use and Health Substate Estimates | 2006-2008,2008-2010,2010-2012                                   |
| Treatment gap for drug use - Needing But Not Receiving Treatment for Illicit Drug Use in the Past Year among Individuals Aged 12 or Older | National Survey of Drug Use and Health Substate Estimates | 2006-2008,2008-2010,2010-2012                                   |
| Percent of deaths with underlying cause of R99 code (state-level): ill-defined and unknown cause of mortality                             | Mortality Data                                            | 2005,2006,2007,2008,2009,2010,2011,2012,2013,2014,2015          |
| Percent of deaths pending (state-level)                                                                                                   | Mortality Data                                            | 2005,2006,2007,2008,2009,2010,2011,2012,2013,2014,2015          |
| Model-based age adjusted death rates due to drug poisoning                                                                                | Model-Based Drug Poisoning Estimates                      | 2005,2006,2007,2008,2009,2010,2011,2012,2013,2014 <sup>10</sup> |
|                                                                                                                                           |                                                           |                                                                 |

<sup>10</sup> Values for 2014 were carried forward to 2015.

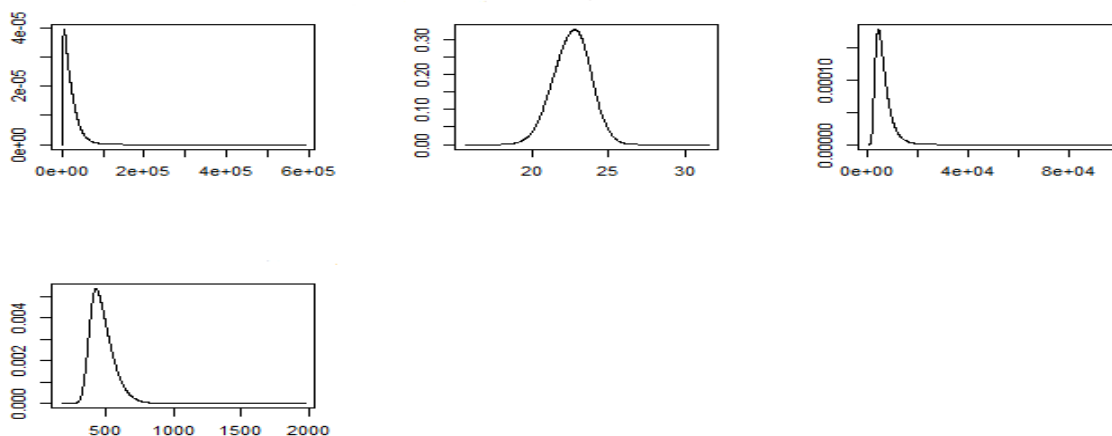

Figure S3. Model diagnostics from the best model with all covariates. The above plots for the marginals of the precisions of the prior variances for non-spatial effects,  $\tau_v$ , spatial effects,  $\tau_u$ , correlated time effect,  $\tau_{\varphi_1}$  and iid space time interaction effect,  $\tau_{\psi}$ .

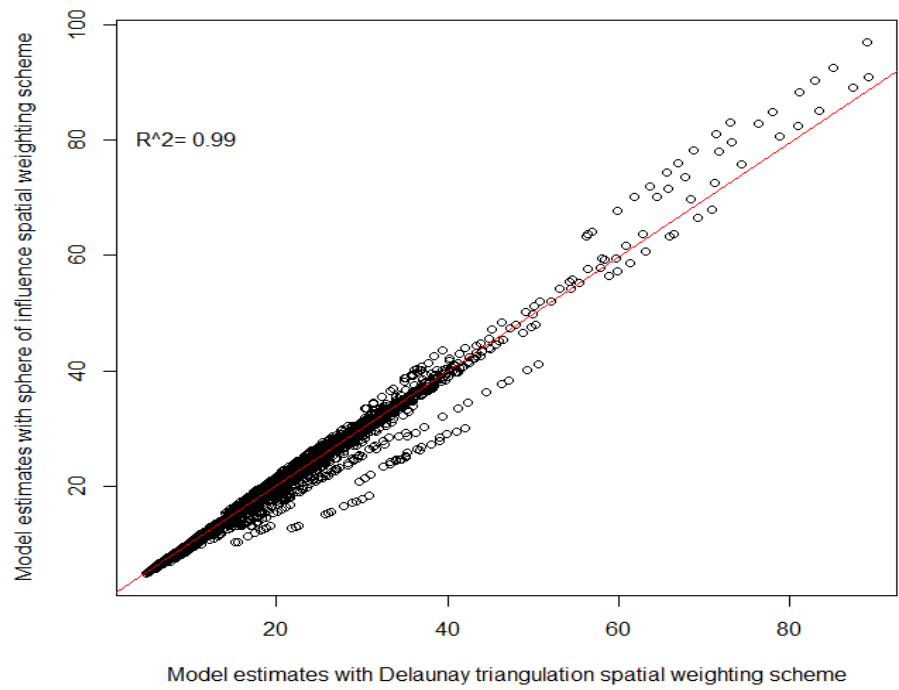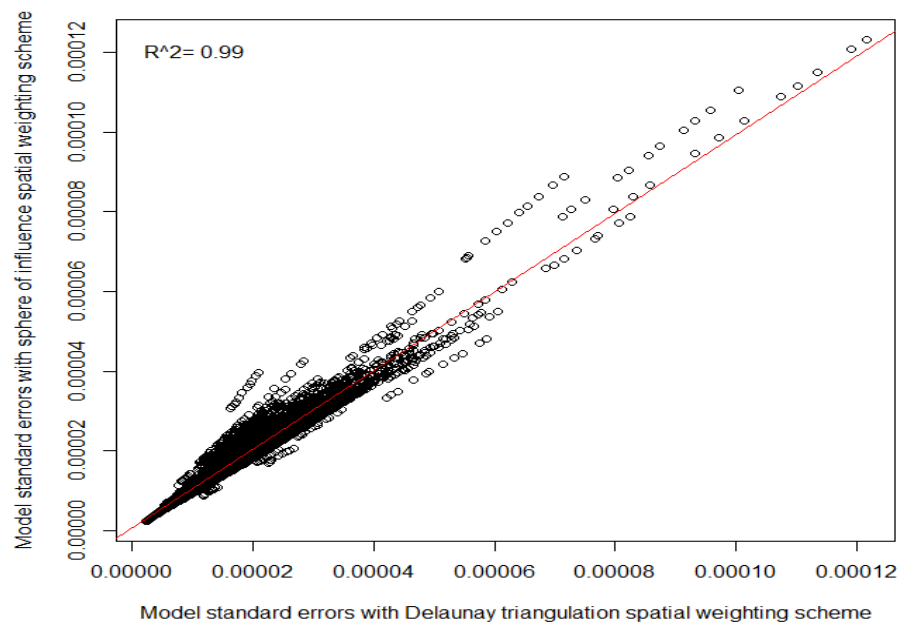

Figure S4. Comparison of the estimated county level SRs (top) and the associated posterior standard deviations (bottom) obtained from the best model with all covariates using the Delaunay triangulation and sphere of influence spatial weighting schemes.

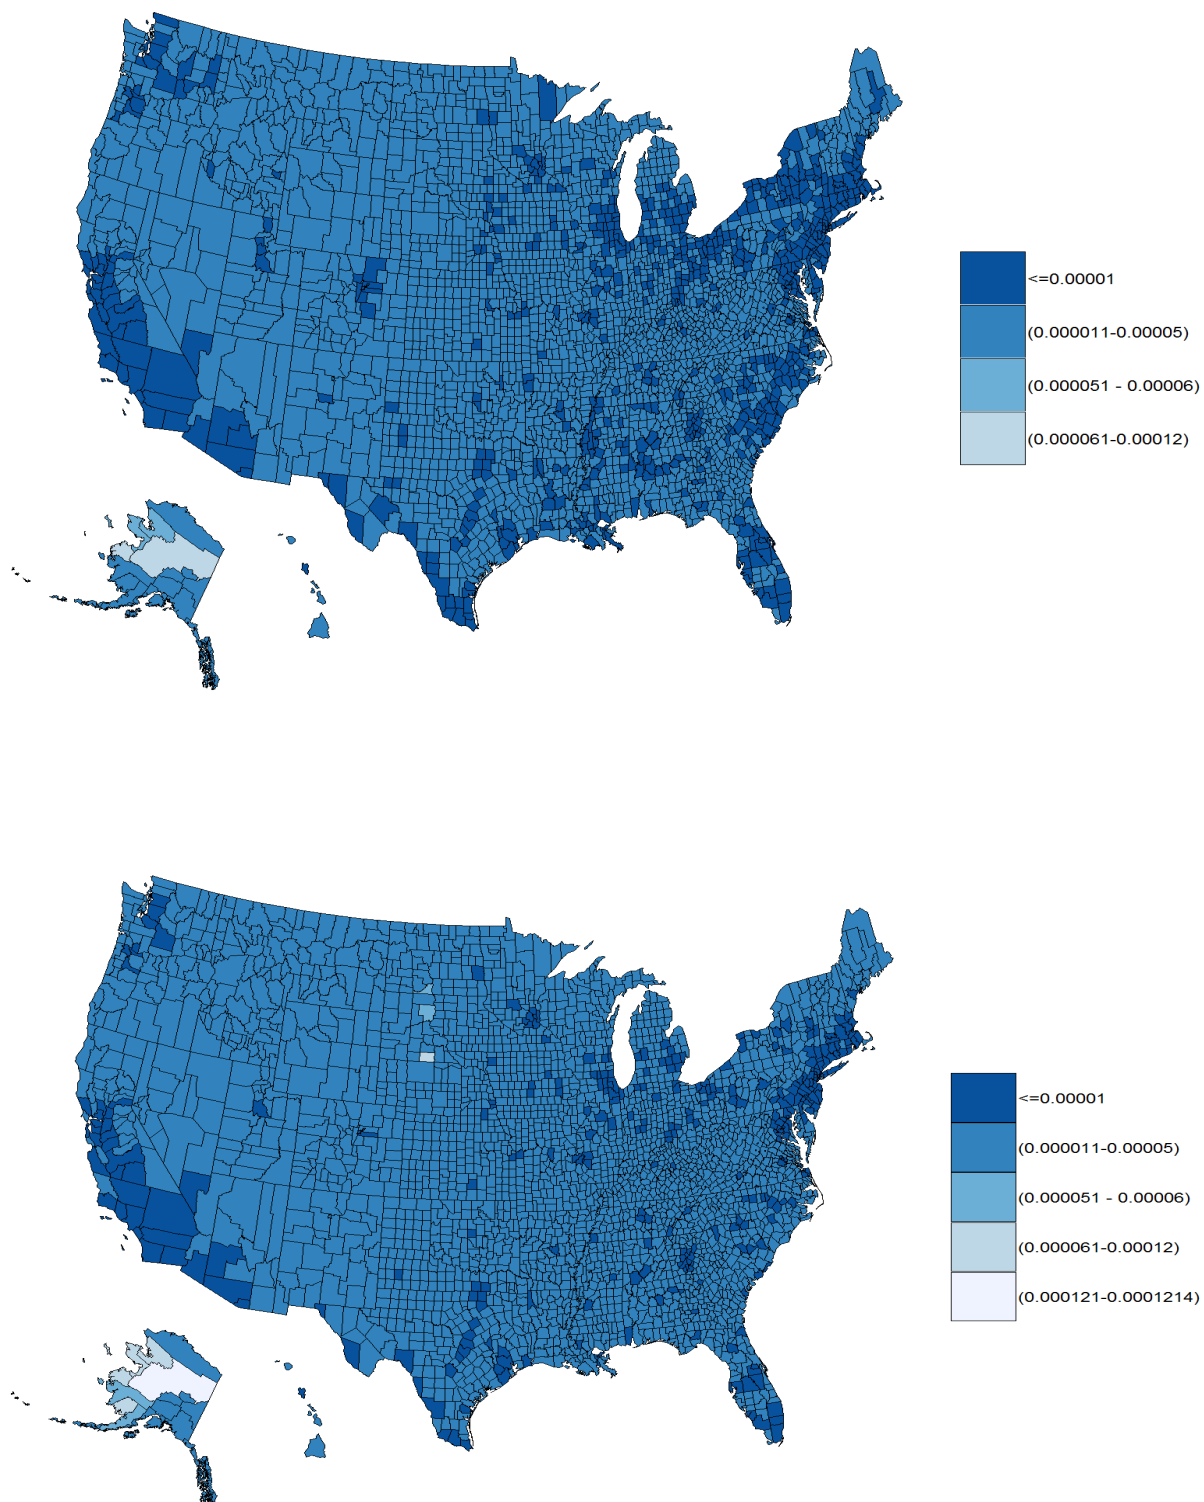

Figure S5. Uncertainty in the county level SRs for the year 2005 (top) and 2015 (bottom) from the best model with all covariates.



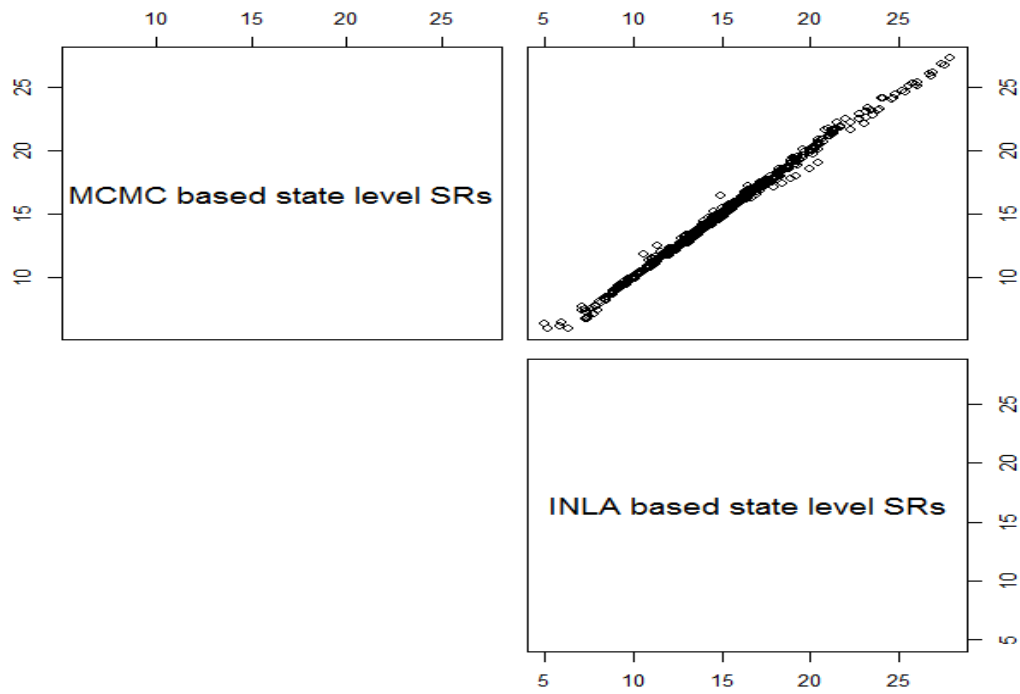

Figure S6. Scatterplot of aggregated state level MCMC simulations based SRs vs aggregated state level INLA based SRs, 2005-2015.

Table s2. Parameter estimates and 95% credible intervals from the best fitting model

| Covariate                                                                                             | $\beta$ | 95% Bayesian Credible Interval |   |
|-------------------------------------------------------------------------------------------------------|---------|--------------------------------|---|
| Intercept                                                                                             | -8.76   | (-8.76,-8.75)                  | * |
| Demographic factors                                                                                   |         |                                |   |
| Land area (sq mi)                                                                                     | 0.01    | (-0.002,0.02)                  |   |
| Mean household size                                                                                   | -0.08   | (-0.10,-0.06)                  | * |
| Housing Unit Density per Square Mile                                                                  | -0.002  | (-0.01,0.003)                  |   |
| Median age                                                                                            | 0.02    | (-0.0002,0.03)                 |   |
| Percent American Indian or Alaska Native                                                              | -0.004  | (-0.02,0.015)                  |   |
| Percent Asian                                                                                         | -0.02   | (-0.04,-0.01)                  | * |
| Percent non-Hispanic Black                                                                            | 0.05    | (0.03,0.06)                    | * |
| Percent foreign born                                                                                  | 0.04    | (0.02,0.05)                    | * |
| Percent Hispanic                                                                                      | 0.04    | (0.01,0.07)                    | * |
| Percent non-Hispanic White                                                                            | 0.02    | (0.01,0.03)                    | * |
| Percent rural population                                                                              | -0.02   | (-0.03,-0.005)                 | * |
| Percent urban population                                                                              | -0.17   | (-0.22,-0.12)                  | * |
| Veteran population estimate                                                                           | -0.06   | (-0.08,-0.04)                  | * |
| Percent of females divorced                                                                           | 0.04    | (0.030,0.05)                   | * |
| Socioeconomic and housing-related factors                                                             |         |                                |   |
| Median household income                                                                               | 0.06    | (0.04,0.1)                     | * |
| Median home value                                                                                     | -0.02   | (-0.04,-0.0003)                | * |
| Median gross rent                                                                                     | -0.07   | (-0.1,-0.04)                   | * |
| % Housing Units with more than 1 person/room                                                          | -15.2   | (-49.36,17.4)                  |   |
| Median per capita income                                                                              | -15.2   | (-49.38,17.38)                 |   |
| % Persons aged 25+ w/ High School Diploma                                                             | 0.02    | (0.001,0.04)                   | * |
| % Persons aged 25+ w/ less than High School Diploma                                                   | -0.01   | (-0.03,0.002)                  |   |
| % Persons aged 25+ w/ 4+ Yrs College                                                                  | 0.0004  | (-0.006,0.007)                 |   |
| Percent in owner-occupied housing                                                                     | -0.04   | (-0.05,-0.02)                  | * |
| Percent below the poverty level                                                                       | -0.046  | (-0.09,0.002)                  |   |
| Percent female headed household                                                                       | -0.16   | (-0.66,0.34)                   |   |
| Percent workers in agriculture/forestry/fishing/hunting/<br>mine work                                 | -0.03   | (-0.2,0.13)                    |   |
| Percent workers in construction                                                                       | -0.1    | (-0.41,0.21)                   |   |
| Percent workers in Education/Healthcare/Social Assistance                                             | -0.15   | (-0.64,0.33)                   |   |
| Percent workers in manufacturing                                                                      | -0.15   | (-0.67,0.37)                   |   |
| Percent workers in Other Industries                                                                   | 0.008   | (-3.9E-05,0.017)               |   |
| Unemployment rate, 16+                                                                                | 0.02    | (0.005,0.03)                   | * |
| Estimated number of foreclosure starts divided by number of<br>mortgages times 100.                   | 0.001   | (-0.007,0.009)                 |   |
| United States Postal Service data from June 2008 on residential<br>addresses vacant 90-days or longer | 0.01    | (8.93E-05,0.016)               |   |

|                                                                                                                                                         |        |                  |   |
|---------------------------------------------------------------------------------------------------------------------------------------------------------|--------|------------------|---|
| Estimated high cost loan rate: percent of loans shown to be high cost according to Home Mortgage Disclosure Act data                                    | -0.002 | (-0.0073,-0.003) | * |
| Health and crime-related factors                                                                                                                        |        |                  |   |
| Number of violent crimes                                                                                                                                | -0.003 | (-0.01,0.002)    |   |
| Number of property crimes                                                                                                                               | 0.031  | (0.007,0.06)     | * |
| Number of drug abuse violations-total                                                                                                                   | -.02   | (-0.04,0.001)    |   |
| All other offenses except traffic                                                                                                                       | -0.04  | (-0.06,-0.02)    | * |
| Prevalence of illicit drug or alcohol abuse/dependence in past year                                                                                     | 0.03   | (0.01,0.05)      | * |
| Prevalence of any mental illness in past year                                                                                                           | 0.01   | (-0.003,0.016)   |   |
| Prevalence of nonmedical Use of Pain Relievers in the Past Year among Individuals Aged 12 or Older                                                      | -0.002 | (-0.01,0.005)    |   |
| Prevalence of Major Depressive Episode in the Past Year among Adults Aged 18 or Older                                                                   | 0.014  | (0.007,0.02)     |   |
| Prevalence of Marijuana Use in the Past Year among Individuals Aged 12 or Older                                                                         | 0.003  | (-0.012,0.02)    |   |
| Prevalence of Serious Mental Illness in the Past Year among Adults Aged 18 or Older                                                                     | -0.001 | (-0.02,0.001)    |   |
| Prevalence of Serious Thoughts of Suicide in the Past Year among Adults Aged 18 or Older                                                                | -0.003 | (-0.01,0.01)     |   |
| Prevalence of Illicit Drug Use in the Past Month among Individuals Aged 12 or Older                                                                     | -.0003 | (-0.02,0.02)     |   |
| Prevalence of Tobacco Product Use in the Past Month among Individuals Aged 12 or Older                                                                  | 0.007  | (-0.002,0.02)    |   |
| Treatment gap for alcohol - Prevalence of Needing But Not Receiving Treatment for Alcohol Use in the Past Year among Individuals Aged 12 or Older       | -0.03  | (-0.05,-0.02)    | * |
| Treatment gap for drug use - Prevalence of Needing But Not Receiving Treatment for Illicit Drug Use in the Past Year among Individuals Aged 12 or Older | -0.02  | (-0.03,-0.01)    | * |
| Percent of deaths with underlying cause of R99 code (state-level): ill-defined and unknown cause of mortality                                           | -0.004 | (-0.02,-0.004)   | * |
| Percent of deaths pending (state-level)                                                                                                                 | -0.02  | (-0.02,-0.01)    | * |
| Model-based age adjusted death rates due to drug poisoning                                                                                              | 0.06   | (0.05,0.07)      | * |

Note: \* indicates the 95% CI excludes zero. Coefficients are on the logit scale.
